# Supplementary material
Source: publisher figshare collection journal article supplement (https://sage.figshare.com/ndownloader/files/15564197)
Supplement: Supplementary file 1 [file 15564197]

## SUPPLEMENTARY

### Supplementary Table 1 Search term translation example

Query translation:

((("endoscopy"[MeSH Terms] OR "endoscopy"[All Fields] OR "endoscopic"[All Fields]) OR (minimally[All Fields] AND invasive[All Fields])) AND (open[All Fields] OR traditional[All Fields] OR external[All Fields]) AND (sinonasal[All Fields] OR ("nasopharynx"[MeSH Terms] OR "nasopharynx"[All Fields] OR "nasopharyngeal"[All Fields])))

Direct translations:

|                |                                                                                        |
|----------------|----------------------------------------------------------------------------------------|
| endoscopic     | "endoscopy"[MeSH Terms] OR "endoscopy"[All Fields] OR "endoscopic"[All Fields]         |
| nasopharyngeal | "nasopharynx"[MeSH Terms] OR "nasopharynx"[All Fields] OR "nasopharyngeal"[All Fields] |

## Supplementary Table 2

### Newcastle-Ottawa Score Assessment <sup>19</sup>

The criteria for quality assessment consist of eight criteria, which can be answered as either present/implied (\*) or absent (.). The criteria, with maximum score in brackets, are:

#### Selection

1. Representativeness of Cohort (\*)
2. Selection of Nonexposed (\*)
3. Cohort Ascertainment of Exposure (\*)
4. Outcome of Interest (\*)

#### Comparability

5. Comparability of Cohorts (\*\*)

#### Outcome

6. Assessment of Outcome (\*)
7. Adequate Duration of Follow-up (\*)
8. Adequate Follow-up of Cohort (\*)

The results for each study are displayed below.

| Study                 | Criteria |   |   |   |    |   |   |   | Score | Quality |
|-----------------------|----------|---|---|---|----|---|---|---|-------|---------|
|                       | 1        | 2 | 3 | 4 | 5  | 6 | 7 | 8 |       |         |
| Hagemann et al. 2018  | *        | * | * | * | ** | * | * | * | 9     | Good    |
| Huang et al. 2018     | *        | . | * | * | *  | * | * | * | 7     | Good    |
| Fu et al. 2017        | *        | * | * | * | *  | * | . | * | 7     | Good    |
| Farquhar et al. 2016  | *        | * | * | * | *  | * | * | * | 8     | Good    |
| Mortuaire et al. 2016 | *        | * | * | * | ** | * | * | * | 9     | Good    |
| Naunheim et al.2016   | *        | * | * | * | *  | * | . | * | 7     | Good    |
| Bhayani et al. 2014   | *        | * | * | * | ** | * | * | * | 8     | Good    |
| Guo et al. 2014       | *        | * | * | * | ** | * | * | . | 8     | Good    |
| Saedi et al. 2014     | *        | * | * | * | ** | * | . | * | 8     | Good    |
| Arnold et al. 2012    | *        | * | * | * | ** | * | * | * | 9     | Good    |

Good quality: 3 or 4 stars in selection domain AND 1 or 2 stars in comparability domain AND 2 or 3 stars in outcome/exposure domain.

Fair quality: 2 stars in selection domain AND 1 or 2 stars in comparability domain AND 2 or 3 stars in outcome/exposure domain.

Poor quality: 0 or 1 star in selection domain OR 0 stars in comparability domain OR 0 or 1 stars in outcome/exposure domain.
